# Supplementary material
Source: PubMed Central journal article supplement (PMC1804160)
Supplement: bmj_334_7590_413__1.pdf [file bmj_334_7590_413__1.pdf]

**[Posted as supplied by author]**

**Web references**

W1 Presutti RJ. Prevention and treatment of dog bites *Am J Phys* 2001 63 1567-1572

W2 Rosenthal DU. When K-9s cause chaos: an examination of police dog policies and their liabilities New York Law School of Human Rights 1994; 11279-310)

W3 Morgan MS. *Capnocytophaga canimorsus* in peripheral blood smears. *J Clin Pathol* 1994; 47: 681-2

W4 Spiegl JD, Szabo RM. A protocol for the treatment of severe infections of the hand. *J Hand Surg* 1988;13A: 254-259

W5 Zook EG, Miller M, Van Beek AL. Successful treatment protocol for canine fang injuries. *J Trauma* 1980; 20: 243 –6

W6 Talan DA, Staatz A, Goldstein EJC, Singer K, Overturf GD. *Staphylococcus intermedius* in canine gingiva and canine inflicted wound infections: a laboratory characteristic of newly recognised zoonotic pathogen. *J Clin Microbiol* 1989; 27: 78-81

W7 Raffi F, Baron D, Drudgeon HB, Nicolas F, Courtieu AL. *Pasteurella multocida* bacteraemia: report of thirteen cases over twelve years and review of the literature. *Scand J Inf Dis* 1987; 19: 385-93

W8 Smith MR, Walker A, Brenchley J. Barking up the wrong tree? A survey of dog bite wound management *Emerg Med J* 2003 30 253-255

W9 Wiggins ME, Akelman ME, Weiss AP. The management of dog bites and dog bite infections of the hand. *Ann Emerg Med* 1980; 9: 410-4.

W10 Levin JM, Talan DA. Erythromycin failure with subsequent *Pasteurella multocida* meningitis and septic arthritis in a cat-bite victim *Ann Emerg Med* 1990 ;19: 1458-61

W11 Goldstein EJ, Citron DM. Comparative susceptibilities of 173 aerobic and anaerobic bite wound isolates to sparfloxacin, temofloxacin, clarithromycin and older agents. *Antimicrob Ag Chemother* 1993; 37:1150-3.

W12 Spagnuolo PJ. *Pasteurella multocida* Infectious Arthritis *Am J Med Sci* 1978; 275:359-363

W13 Chapman S, Cornwall J, Righetti J, Sung L. Preventing dog bites in children: randomised controlled trial of an educational intervention. *BMJ* 2000; 320:512-4

W14 Rupprecht CE, Hanlon CA, Hemachudha T. Rabies re-examined *Lancet Infect Dis* 2002; 2: 327-43
